# Supplementary material for: Recent advances in upgrading CO2 to C3+ products via electrochemical and complementary engineering
Source: Royal Society of Chemistry journal article supplement (doi:10.1039/d4ta03088e), 2024-01-01
Supplement: d4ta03088e1.pdf [file d4ta03088e1.pdf]

**Table S1.** Summary of catalysts for direct electrochemical CO<sub>2</sub>/CO-to-C<sub>3+</sub> conversion.

| Category                   | Catalyst <sup>a</sup> | Feed                    | Electrolyte             | pH <sup>b</sup> | Major C <sub>3+</sub> product(s) <sup>c</sup> | Reference electrode | Potential (V) <sup>d</sup> | <i>j</i> <sub>C3+</sub> (mA cm <sup>-2</sup> ) <sup>e</sup> | Optimal FE (%) <sup>e</sup> | Ref. |
|----------------------------|-----------------------|-------------------------|-------------------------|-----------------|-----------------------------------------------|---------------------|----------------------------|-------------------------------------------------------------|-----------------------------|------|
| Single-crystal Cu          | Cu(111)               | CO <sub>2</sub>         | 0.1 M KHCO <sub>3</sub> | 6.8             | PrD+AlOH+1-PrOH                               | SHE                 | -1.55                      | 0.07                                                        | 1.3                         | 1    |
|                            | Cu(11 9 9)            | CO <sub>2</sub>         | 0.1 M KHCO <sub>3</sub> | 6.8             | PrD+AlOH+1-PrOH                               | SHE                 | -1.48                      | 0.09                                                        | 1.8                         | 1    |
|                            | Cu(755)               | CO <sub>2</sub>         | 0.1 M KHCO <sub>3</sub> | 6.8             | PrD+AlOH+1-PrOH                               | SHE                 | -1.43                      | 0.13                                                        | 2.5                         | 1    |
|                            | Cu(533)               | CO <sub>2</sub>         | 0.1 M KHCO <sub>3</sub> | 6.8             | PrD+AlOH+1-PrOH                               | SHE                 | -1.42                      | 0.08                                                        | 1.6                         | 1    |
|                            | Cu(211)               | CO <sub>2</sub>         | 0.1 M KHCO <sub>3</sub> | 6.8             | PrD+AlOH+1-PrOH                               | SHE                 | -1.38                      | 0.20                                                        | 4.0                         | 1    |
|                            | Cu(311)               | CO <sub>2</sub>         | 0.1 M KHCO <sub>3</sub> | 6.8             | PrD+AlOH+1-PrOH                               | SHE                 | -1.37                      | 0.21                                                        | 4.2                         | 1    |
|                            | Cu(511)               | CO <sub>2</sub>         | 0.1 M KHCO <sub>3</sub> | 6.8             | PrD+AlOH+1-PrOH                               | SHE                 | -1.36                      | 0.40                                                        | 7.9                         | 1    |
|                            | Cu(711)               | CO <sub>2</sub>         | 0.1 M KHCO <sub>3</sub> | 6.8             | PrD+AlOH+1-PrOH                               | SHE                 | -1.34                      | 0.60                                                        | 12.0                        | 1    |
|                            | Cu(911)               | CO <sub>2</sub>         | 0.1 M KHCO <sub>3</sub> | 6.8             | PrD+AlOH+1-PrOH                               | SHE                 | -1.36                      | 0.47                                                        | 9.4                         | 1    |
|                            | Cu(11 1 1)            | CO <sub>2</sub>         | 0.1 M KHCO <sub>3</sub> | 6.8             | PrD+AlOH+1-PrOH                               | SHE                 | -1.37                      | 0.33                                                        | 6.6                         | 1    |
|                            | Cu(100)               | CO <sub>2</sub>         | 0.1 M KHCO <sub>3</sub> | 6.8             | PrD+AlOH+1-PrOH                               | SHE                 | -1.40                      | 0.26                                                        | 5.1                         | 1    |
|                            | Cu(810)               | CO <sub>2</sub>         | 0.1 M KHCO <sub>3</sub> | 6.8             | PrD+AlOH+1-PrOH                               | SHE                 | -1.38                      | 0.20                                                        | 3.9                         | 1    |
|                            | Cu(610)               | CO <sub>2</sub>         | 0.1 M KHCO <sub>3</sub> | 6.8             | PrD+AlOH+1-PrOH                               | SHE                 | -1.37                      | 0.23                                                        | 4.5                         | 1    |
|                            | Cu(510)               | CO <sub>2</sub>         | 0.1 M KHCO <sub>3</sub> | 6.8             | PrD+AlOH+1-PrOH                               | SHE                 | -1.38                      | 0.30                                                        | 6.0                         | 1    |
|                            | Cu(310)               | CO <sub>2</sub>         | 0.1 M KHCO <sub>3</sub> | 6.8             | PrD+AlOH+1-PrOH                               | SHE                 | -1.42                      | 0.27                                                        | 5.4                         | 1    |
|                            | Cu(210)               | CO <sub>2</sub>         | 0.1 M KHCO <sub>3</sub> | 6.8             | PrD+AlOH+1-PrOH                               | SHE                 | -1.52                      | 0.07                                                        | 1.3                         | 1    |
|                            | Cu(332)               | CO <sub>2</sub>         | 0.1 M KHCO <sub>3</sub> | 6.8             | PrD+AlOH+1-PrOH                               | SHE                 | -1.51                      | 0.04                                                        | 0.70                        | 1    |
|                            | Cu(331)               | CO <sub>2</sub>         | 0.1 M KHCO <sub>3</sub> | 6.8             | PrD+AlOH+1-PrOH                               | SHE                 | -1.55                      | 0.05                                                        | 0.90                        | 1    |
|                            | Cu(110)               | CO <sub>2</sub>         | 0.1 M KHCO <sub>3</sub> | 6.8             | PrD+AlOH+1-PrOH                               | SHE                 | -1.58                      | 0.07                                                        | 1.34                        | 1    |
|                            | Cu(650)               | CO <sub>2</sub>         | 0.1 M KHCO <sub>3</sub> | 6.8             | PrD+AlOH+1-PrOH                               | SHE                 | -1.59                      | 0.04                                                        | 0.86                        | 1    |
| Cu(320)                    | CO <sub>2</sub>       | 0.1 M KHCO <sub>3</sub> | 6.8                     | PrD+AlOH+1-PrOH | SHE                                           | -1.52               | 0.07                       | 1.3                                                         | 1                           |      |
| Nanostructured Cu or OD-Cu | Cu NPs < 100 nm       | CO <sub>2</sub>         | 1 M KHCO <sub>3</sub>   | 7.8             | AcO+AlOH+1-PrOH                               | Ag/AgCl             | -1.50                      | ~7                                                          | ~7                          | 2    |

|                         |                 |                          |      |                                    |         |       |           |         |    |
|-------------------------|-----------------|--------------------------|------|------------------------------------|---------|-------|-----------|---------|----|
| Cu NPs < 100 nm         | CO              | 1 M KHCO <sub>3</sub>    | 8.3  | AcO+AlOH+1-PrOH                    | Ag/AgCl | -1.50 | ~31       | ~28     | 2  |
| Cu 5 μm                 | CO <sub>2</sub> | 1 M KHCO <sub>3</sub>    | 7.8  | AcO+AlOH+1-PrOH                    | Ag/AgCl | -1.30 | ~3        | ~4      | 2  |
| Cu 5 μm                 | CO              | 1 M KHCO <sub>3</sub>    | 8.3  | AcO+AlOH+1-PrOH                    | Ag/AgCl | -1.30 | ~7        | ~7      | 2  |
| trans-CuEn              | CO <sub>2</sub> | 0.1 M CsHCO <sub>3</sub> | 6.8  | 1-PrOH                             | RHE     | -0.75 | 0.80      | ~4      | 3  |
| BCF-Cu <sub>2</sub> O   | CO              | 1 M KOH                  | 14   | 1-PrOH                             | RHE     | -0.45 | 0.85      | 19.3    | 4  |
| Cu/Cu <sub>2</sub> O@NG | CO <sub>2</sub> | 0.2 M KI                 | 5.17 | 1-PrOH                             | RHE     | -1.90 | ~1.60     | ~10     | 5  |
| Cu nanocavity           | CO              | 1 M KOH                  | 14   | 1-PrOH                             | RHE     | -0.56 | 7.8 ± 0.5 | 21 ± 1  | 6  |
| 3-shell                 | CO <sub>2</sub> | 0.5 M KHCO <sub>3</sub>  | 7.5  | 1-PrOH                             | RHE     | -0.65 | 11        | ~15     | 7  |
| HoMSs                   |                 |                          |      |                                    |         |       |           |         |    |
| 2-shell                 | CO              | 1 M KOH                  | 14   | 1-PrOH                             | Hg/HgO  | -1.90 | 11        | 22      | 8  |
| YSNPs                   |                 |                          |      |                                    |         |       |           |         |    |
| OD-Cu NCs               | CO <sub>2</sub> | 0.1 M KHCO <sub>3</sub>  | 6.8  | 1-PrOH                             | RHE     | -0.95 | 1.74      | 8.8     | 9  |
| HF-Cu                   | CO              | 1 M KOH                  | 14   | 1-PrOH                             | RHE     | -0.45 | 8.5       | 20      | 10 |
| Cu AD                   | CO              | 1 M KOH                  | 14   | 1-PrOH                             | RHE     | -0.47 | 11        | 23      | 11 |
| Cu(OH) <sub>2</sub> -D  | CO <sub>2</sub> | 0.1 M KHCO <sub>3</sub>  | 6.8  | 1-PrOH                             | RHE     | -0.98 | ~4        | 11      | 12 |
| Cu(OH) <sub>2</sub> -D  | CO <sub>2</sub> | 1 M KOH                  | 14   | 1-PrOH                             | RHE     | -0.54 | ~17.5     | 7       | 12 |
| CuOD-Cu                 | CO <sub>2</sub> | 0.1 M KHCO <sub>3</sub>  | 6.8  | 1-PrOH                             | RHE     | -0.94 | 4.61      | 17.9    | 13 |
| CuOD-Cu                 | CO <sub>2</sub> | 1 M KHCO <sub>3</sub>    | 7.8  | 1-PrOH                             | RHE     | -0.94 | 8.51      | 6.96    | 13 |
| R-Cu/Au                 | CO              | 1 M KOH                  | 14   | 1-PrOH                             | RHE     | -0.58 | 21.5      | 48.0    | 14 |
| Cu <sub>2</sub> S-Cu-V  | CO <sub>2</sub> | 0.1 M KHCO <sub>3</sub>  | 6.8  | 1-PrOH                             | RHE     | -0.95 | 2.5 ± 0.1 | 8 ± 0.7 | 15 |
| DSV-rich                | CO <sub>2</sub> | 0.1 M KHCO <sub>3</sub>  | 6.8  | 1-PrOH                             | RHE     | -1.05 | 3.10      | 15.4    | 16 |
| CuS <sub>x</sub>        |                 |                          |      |                                    |         |       |           |         |    |
| Cu <sub>2</sub> O-Cl    | CO <sub>2</sub> | 0.1 M KCl                | 3.98 | 1-PrOH                             | RHE     | -1.6  | 0.96      | 8.7     | 17 |
| O-plasma Cu             | CO <sub>2</sub> | 0.1 M KHCO <sub>3</sub>  | 6.8  | 1-PrOH                             | RHE     | -1.00 | ~3.2      | ~9      | 17 |
| Cu <sub>2</sub> O-I     | CO              | 1 M KOH                  | 14   | C <sub>3</sub> -C <sub>6</sub> AcE | RHE     | -0.72 | 55        | 22      | 18 |

|                     |                                                  |                 |                                                   |              |                                      |         |       |      |      |    |
|---------------------|--------------------------------------------------|-----------------|---------------------------------------------------|--------------|--------------------------------------|---------|-------|------|------|----|
| Doped or alloyed Cu | Cu <sub>91</sub> Pd <sub>9</sub>                 | CO <sub>2</sub> | 0.5 M KHCO <sub>3</sub>                           | 7.5          | 1-PrOH                               | RHE     | -0.65 | 1.15 | 13.7 | 19 |
|                     | Cu <sub>98</sub> Au <sub>2</sub>                 | CO <sub>2</sub> | 1 M KOH                                           | 14           | 1-PrOH                               | RHE     | -0.41 | 12.7 | 18.2 | 20 |
|                     | Cu <sub>96</sub> Ag <sub>4</sub>                 | CO              | 1 M KOH                                           | 14           | 1-PrOH                               | RHE     | -0.46 | 4.5  | 33   | 21 |
|                     | Cu <sub>95</sub> Ag <sub>4</sub> Ru <sub>1</sub> | CO              | 1 M KOH                                           | 14           | 1-PrOH                               | RHE     | -0.46 | 111  | 37   | 22 |
|                     | CuAg <sub>5%</sub> N <sub>20h</sub>              | CO              | 1 M CsOH                                          | 14           | 1-PrOH                               | RHE     | -1.00 | 67.5 | 45   | 23 |
|                     | Cu <sub>94</sub> Ag <sub>6</sub>                 | CO <sub>2</sub> | 1 M CsHCO <sub>3</sub> +<br>0.3 M CO <sub>2</sub> | 5.4 ±<br>0.4 | 2-PrOH                               | RHE     | -0.73 | 12.0 | 39.6 | 24 |
|                     | Cu <sub>94</sub> Ag <sub>6</sub>                 | CO <sub>2</sub> | 1 M CsHCO <sub>3</sub> +<br>3 M CO <sub>2</sub>   |              | 2-PrOH                               | RHE     | -0.70 | 59.3 | 56.7 | 24 |
| CuSA                | Pb-Cu                                            | CO              | 1 M KOH                                           | 14           | 1-PrOH                               | RHE     | -0.68 | 38   | 47   | 25 |
|                     | Cu-SA/NPC                                        | CO <sub>2</sub> | 0.1 M KHCO <sub>3</sub>                           | 6.8          | AcO                                  | RHE     | -0.36 | 2.35 | 36.7 | 26 |
| Non-Cu              | MoS <sub>2</sub>                                 | CO <sub>2</sub> | 0.1 M Na <sub>2</sub> CO <sub>3</sub>             | 6.8          | 1-PrOH                               | RHE     | -0.59 | 0.25 | 3.5  | 27 |
|                     | Ni <sub>3</sub> Al                               | CO <sub>2</sub> | 0.1 M K <sub>2</sub> SO <sub>4</sub>              | 4.5          | 1-PrOH                               | Ag/AgCl | -1.38 | 0.04 | 1.9  | 28 |
|                     | PD-Ni                                            | CO <sub>2</sub> | 0.1 M KHCO <sub>3</sub>                           | 6.8          | C <sub>3</sub> to C <sub>6</sub> HCs | RHE     | -1.20 | 0.91 | 6.5  | 29 |
|                     | NiP <sub>2</sub>                                 | CO <sub>2</sub> | 0.5 M KHCO <sub>3</sub>                           | 7.5          | methylglyoxal                        | RHE     | -0.10 | 0.39 | 84   | 30 |
|                     | Ni <sub>2</sub> P                                | CO <sub>2</sub> | 0.5 M KHCO <sub>3</sub>                           | 7.5          | 2,3-furandiol                        | RHE     | 0.00  | 0.02 | 71   | 30 |
|                     | ImF-Mo <sub>3</sub> P                            | CO <sub>2</sub> | 1 M KOH                                           | 14           | C <sub>3</sub> H <sub>8</sub>        | RHE     | -0.80 | 359  | 91   | 31 |

- a. Some abbreviations for catalysts: NPs, nanoparticles; trans-CuEn, transformed Cu-NP ensemble; BCF, branching cubic framework; NG, nitrogen-doped graphene; HoMSs, hollow multi-shell structures; YSNPs, yolk-shell nanoparticles; OD-Cu, oxide-derived Cu; NCs, nanocrystals; HF-Cu, highly fragmented Cu; Cu AD, Cu adparticle; Cu(OH)<sub>2</sub>-D, Cu(OH)<sub>2</sub>-derived Cu; CuOD-Cu, CuO-derived Cu; R-Cu/Au, reconstructed Cu assisted with Au NPs; Cu<sub>2</sub>S-Cu-V, core-shell Cu<sub>2</sub>S-Cu with Cu vacancy; DSV, double sulfur vacancies; Cu<sub>2</sub>O-Cl, chlorine-induced bi-phasic Cu<sub>2</sub>O-Cu; Cu<sub>2</sub>O-I, iodine-modified Cu<sub>2</sub>O; CuAg<sub>5%</sub>N<sub>20h</sub>, nitride-derived Cu with 5 mol% Ag and 20-h nitridation duration; Cu-SA/NPC, single-atom Cu encapsulated on nitrogen-doped porous carbon; PD-Ni, phosphate-derived Ni; ImF-Mo<sub>3</sub>P, imidazolium-functionalized Mo<sub>3</sub>P.
- b. The values of pH were either directly adopted from the original study or estimated based on Ref.32.
- c. Abbreviations for products: PrD, propionaldehyde; ALOH, allyl alcohol; 1-PrOH, 1-propanol; AcO, acetone; AcE, acetate ester; 2-PrOH, 2-propanol; HCs,

hydrocarbons; C<sub>3</sub>H<sub>8</sub>, propane.

- d. The values of potential were directly adopted from the original study, and some of these values were not subjected to *i*R-correction.
- e.  $j_{C_3^+}$ , partial current density of C<sub>3</sub><sup>+</sup>; FE, Faradaic efficiency.

## Reference

- 1 Y. Hori, I. Takahashi, O. Koga and N. Hoshi, *J. Mol. Catal. A: Chem.*, 2003, **199**, 39–47.
- 2 N. S. Romero Cuellar, K. Wiesner-Fleischer, M. Fleischer, A. Rucki and O. Hinrichsen, *Electrochim. Acta*, 2019, **307**, 164–175.
- 3 D. Kim, C. S. Kley, Y. Li and P. Yang, *Proc. Natl. Acad. Sci.*, 2017, **114**, 10560–10565.
- 4 J. Liu, F. You, B. He, Y. Wu, D. Wang, W. Zhou, C. Qian, G. Yang, G. Liu, H. Wang, Y. Guo, L. Gu, L. Feng, S. Li and Y. Zhao, *J. Am. Chem. Soc.*, 2022, **144**, 12410–12420.
- 5 W.-Y. Zhi, Y.-T. Liu, S.-L. Shan, C.-J. Jiang, H. Wang and J.-X. Lu, *J. CO<sub>2</sub> Util.*, 2021, **50**, 101594.
- 6 T.-T. Zhuang, Y. Pang, Z.-Q. Liang, Z. Wang, Y. Li, C.-S. Tan, J. Li, C. T. Dinh, P. De Luna, P.-L. Hsieh, T. Burdyny, H.-H. Li, M. Liu, Y. Wang, F. Li, A. Proppe, A. Johnston, D.-H. Nam, Z.-Y. Wu, Y.-R. Zheng, A. H. Ip, H. Tan, L.-J. Chen, S.-H. Yu, S. O. Kelley, D. Sinton and E. H. Sargent, *Nat. Catal.*, 2018, **1**, 946–951.
- 7 C. Liu, M. Zhang, J. Li, W. Xue, T. Zheng, C. Xia and J. Zeng, *Angew. Chem., Int. Ed.*, 2022, **61**, e202113498.
- 8 H. Du, L.-X. Liu, P. Li, Q. Min, S. Guo and W. Zhu, *ACS Nano*, 2023, **17**, 8663–8670.
- 9 D. Ren, N. T. Wong, A. D. Handoko, Y. Huang and B. S. Yeo, *J. Phys. Chem. Lett.*, 2016, **7**, 20–24.
- 10 Y. Pang, J. Li, Z. Wang, C.-S. Tan, P.-L. Hsieh, T.-T. Zhuang, Z.-Q. Liang, C. Zou, X. Wang, P. De Luna, J. P. Edwards, Y. Xu, F. Li, C.-T. Dinh, M. Zhong, Y. Lou, D. Wu, L.-J. Chen, E. H. Sargent and D. Sinton, *Nat. Catal.*, 2019, **2**, 251–258.
- 11 J. Li, F. Che, Y. Pang, C. Zou, J. Y. Howe, T. Burdyny, J. P. Edwards, Y. Wang, F. Li, Z. Wang, P. De Luna, C.-T. Dinh, T.-T. Zhuang, M. I. Saidaminov, S. Cheng, T. Wu, Y. Z. Finfrock, L. Ma, S.-H. Hsieh, Y.-S. Liu, G. A. Botton, W.-F. Pong, X. Du, J. Guo, T.-K. Sham, E. H. Sargent and D. Sinton, *Nat. Commun.*, 2018, **9**, 4614.
- 12 D. Zhong, Z.-J. Zhao, Q. Zhao, D. Cheng, B. Liu, G. Zhang, W. Deng, H. Dong, L. Zhang, J. Li, J. Li and J. Gong, *Angew. Chem., Int. Ed.*, 2021, **60**, 4879–4885.
- 13 C. Long, X. Liu, K. Wan, Y. Jiang, P. An, C. Yang, G. Wu, W. Wang, J. Guo, L. Li, K. Pang, Q. Li, C. Cui, S. Liu, T. Tan and Z. Tang, *Sci.*

- Adv.*, 2023, **9**, eadi6119.
- 14C. Long, K. Wan, Y. Chen, L. Li, Y. Jiang, C. Yang, Q. Wu, G. Wu, P. Xu, J. Li, X. Shi, Z. Tang and C. Cui, *J. Am. Chem. Soc.*, 2024, **146**, 4632–4641.
- 15T.-T. Zhuang, Z.-Q. Liang, A. Seifitokaldani, Y. Li, P. De Luna, T. Burdyny, F. Che, F. Meng, Y. Min, R. Quintero-Bermudez, C. T. Dinh, Y. Pang, M. Zhong, B. Zhang, J. Li, P.-N. Chen, X.-L. Zheng, H. Liang, W.-N. Ge, B.-J. Ye, D. Sinton, S.-H. Yu and E. H. Sargent, *Nat. Catal.*, 2018, **1**, 421–428.
- 16C. Peng, G. Luo, J. Zhang, M. Chen, Z. Wang, T.-K. Sham, L. Zhang, Y. Li and G. Zheng, *Nat. Commun.*, 2021, **12**, 1580.
- 17S. Lee, D. Kim and J. Lee, *Angew. Chem., Int. Ed.*, 2015, **54**, 14701–14705.
- 18Y. Zhou, R. Ganganahalli, S. Verma, H. R. Tan and B. S. Yeo, *Angew. Chem., Int. Ed.*, 2022, **61**, e202202859.
- 19M. Rahaman, K. Kiran, I. Z. Montiel, V. Grozovski, A. Dutta and P. Broekmann, *Green Chem.*, 2020, **22**, 6497–6509.
- 20S. Jeong, C. Huang, Z. Levell, R. X. Skalla, W. Hong, N. J. Escorcía, Y. Losovyj, B. Zhu, A. N. Butrum-Griffith, Y. Liu, C. W. Li, D. Reifsnnyder Hickey, Y. Liu and X. Ye, *J. Am. Chem. Soc.*, 2024, **146**, 4508–4520.
- 21X. Wang, Z. Wang, T.-T. Zhuang, C.-T. Dinh, J. Li, D.-H. Nam, F. Li, C.-W. Huang, C.-S. Tan, Z. Chen, M. Chi, C. M. Gabardo, A. Seifitokaldani, P. Todorović, A. Proppe, Y. Pang, A. R. Kirmani, Y. Wang, A. H. Ip, L. J. Richter, B. Scheffel, A. Xu, S.-C. Lo, S. O. Kelley, D. Sinton and E. H. Sargent, *Nat. Commun.*, 2019, **10**, 5186.
- 22X. Wang, P. Ou, A. Ozden, S.-F. Hung, J. Tam, C. M. Gabardo, J. Y. Howe, J. Sisler, K. Bertens, F. P. García de Arquer, R. K. Miao, C. P. O'Brien, Z. Wang, J. Abed, A. S. Rasouli, M. Sun, A. H. Ip, D. Sinton and E. H. Sargent, *Nat. Energy*, 2022, **7**, 170–176.
- 23H. Phong Duong, J. G. Rivera de la Cruz, N.-H. Tran, J. Louis, S. Zanna, D. Portehault, A. Zitolo, M. Walls, D. V. Peron, M. W. Schreiber, N. Menguy and M. Fontecave, *Angew. Chem., Int. Ed.*, 2023, **62**, e202310788.
- 24K. Qi, Y. Zhang, N. Onofrio, E. Petit, X. Cui, J. Ma, J. Fan, H. Wu, W. Wang, J. Li, J. Liu, Y. Zhang, Y. Wang, G. Jia, J. Wu, L. Lajaunie, C. Salameh and D. Voiry, *Nat. Catal.*, 2023, **6**, 319–331.
- 25W. Niu, Z. Chen, W. Guo, W. Mao, Y. Liu, Y. Guo, J. Chen, R. Huang, L. Kang, Y. Ma, Q. Yan, J. Ye, C. Cui, L. Zhang, P. Wang, X. Xu and B. Zhang, *Nat. Commun.*, 2023, **14**, 4882.
- 26K. Zhao, X. Nie, H. Wang, S. Chen, X. Quan, H. Yu, W. Choi, G. Zhang, B. Kim and J. G. Chen, *Nat. Commun.*, 2020, **11**, 2455.
- 27S. A. Francis, J. M. Velazquez, I. M. Ferrer, D. A. Torelli, D. Guevarra, M. T. McDowell, K. Sun, X. Zhou, F. H. Saadi, J. John, M. H. Richter, F. P. Hyler, K. M. Papadantonakis, B. S. Brunshwig and N. S. Lewis, *Chem. Mater.*, 2018, **30**, 4902–4908.

- 28 A. R. Paris and A. B. Bocarsly, *ACS Catal.*, 2017, **7**, 6815–6820.
- 29 Y. Zhou, A. J. Martín, F. Dattila, S. Xi, N. López, J. Pérez-Ramírez and B. S. Yeo, *Nat. Catal.*, 2022, **5**, 545–554.
- 30 K. U. D. Calvino, A. B. Laursen, K. M. K. Yap, T. A. Goetjen, S. Hwang, N. Murali, B. Mejia-Sosa, A. Lubarski, K. M. Teeluck, E. S. Hall, E. Garfunkel, M. Greenblatt and G. C. Dismukes, *Energy Environ. Sci.*, 2018, **11**, 2550–2559.
- 31 M. Esmacilrad, Z. Jiang, A. M. Harzandi, A. Kondori, M. Tamadoni Saray, C. U. Segre, R. Shahbazian-Yassar, A. M. Rappe and M. Asadi, *Nat. Energy*, 2023, **8**, 891–900.
- 32 H. Zhong, K. Fujii, Y. Nakano and F. Jin, *J. Phys. Chem. C*, 2015, **119**, 55–61.
